# Supplementary material for: Genetic Manipulation of Desulfovibrio ferrophilus and Evaluation of Fe(III) Oxide Reduction Mechanisms
Source: PubMed Central journal article supplement (PMC9769857; doi:10.1128/spectrum.03922-22), 2022-11-29
Supplement: spectrum.03922-22-s0001.pdf [file spectrum.03922-22-s0001.pdf]

## SUPPLEMENTARY INFORMATION

### Genetic Manipulation of *Desulfovibrio ferrophilus* and Evaluation of Fe(III) Oxide Reduction Mechanisms

Toshiyuki Ueki<sup>a\*</sup>, Trevor L. Woodard<sup>a</sup>, and Derek R. Lovley<sup>a,b#</sup>

<sup>a</sup>Department of Microbiology, University of Massachusetts-Amherst, Amherst, MA, USA

<sup>b</sup>Institute for Applied Life Sciences, University of Massachusetts-Amherst

\*Present address: Electrobiomaterials Institute, Key Laboratory for Anisotropy and Texture of Materials (Ministry of Education), Northeastern University, Shenyang 110819, China.

#Address correspondence to Derek R. Lovley, [dlovley@umass.edu](mailto:dlovley@umass.edu)

```
DFE_2355 -----MSLVINNNLMAINAARNMGSAFMSLASSVSRLLSSGLRVTSAAADDAAGLAIRELMRSEIAAMHQGARN
DFE_2171 -----MSLVINHNLMMAMNAARNLTESYGRSLSTRRLSSGLRVGTAAADDAAGLAIRELMRSDIKTLHQGVRN
DFE_0942 -----MSLVINNNLMAMNAARNLGNAYDALASSTNKLSGLRINSAADDAAGLAIRELMRADISTLNQGVN
DFE_0943 -----MSLVINNNIVAMTAARNLGTAYDALSSSTNKLSGLRITTAADDAAGLAVRELMRSDIAALDQGVN
DFE_1910 MDAGTEAFMEESDMSVINNNLMAMNAARNLSNFGALSVSVRRLSSGLRIGTAADDAAGMAIREIMRSDIAALNQGVRN
DFE_0352 -----MSLVINNNLMAANASRNLSQSYSALGTSIRRLSSGLRVGIAADDAAGLAVRELMRSDIAALGQGVN
DFE_2105 -----MSLVINNNLMAANAARNLSQSFALGTSVRRLLSSGLRIGTASDDAAGLAIRELMRSDIAALNQGVRN
          **:*:*:*:*:* .:*:*:* ::. * . * :*****: *:*:*:*:*:*:*:*:*:*:* :. : * . **

DFE_2355 VNDAISLIQTADGAAQVIDEKLIRMKELAEQAATGTYNSDQRLIIDSEYQAMASEITRIANATDFNGIHLNNGNLNGEN-
DFE_2171 ANDAISMVQTADGALQVIDEKLIRMKELAEQAATGTYNSDQRLIIDSEYQAMASEITRIALATDFNQVHLLDGTLSGVVP
DFE_0942 ANDAISMIQTADGALQVVDEKLIRMKELAEQAATGTYSQAQRLIIDSEYQAMASEITRIANATDFNGIMLLDGNLSGTE-
DFE_0943 ANDAISMIQTADGALQVIDEKLIRMKELAEQAATGTYSSTQRLIIDSEYQAMASEITRIANATDFNGIYLLNGLNLS---
DFE_1910 ANDAISMLQTADGALAVIDEKLIRMKELAEQAATGTYNSDQRLIIDSEYQAMASEITRIANATDFNGIYLLNGLNLS---
DFE_0352 ANDAISMIQTADGALQVIDEKLIRMKELAEQASTGTYNSDQRLIIDSEYQAMASEITRIANATDFNGIYLLNGLNLSG---
DFE_2105 ANDAISMIQTADGALQVIDEKLIRMKELAEQAGATGTYNSDQRLIIDSEYQAMASEITRIANATDFNGIYLLNGLNLS---
          .*****:***** *:*:*:*:*:*:*:*:*:*:*:*:*:*:*:*:*:*:*:*:*:*:*:*:*:*:*:*:*:*:*
          *:*:*:*:*:*:*:*:*:*:*:*:*:*:*:*:*:*:*:*:*:*:*:*:*:*:*:*:*:*:*

DFE_2355 SAHVGSAVPTGPKLVHFGSGNDCSEDYIIYISINNATASALGVGNQSA----AGAGFSISTQSAQAQFALDAIKNAIVSK
DFE_2171 TDHDGSGMQPTGPMKIHFGTGNDSSDYFISIGGATASHFGLGLGSDGAASNFGVGGQTISTQSLAQAAALDQAIISK
DFE_0942 ASHDGSGMSATGPKLVHFGTGNDSTEDYIIYVITGDCTASALGVGNQSAV---GSAGYTIISTQSAQAQFALDAIKNAIVSK
DFE_0943 DTHTGSGLSSTGKMKIHFGTANDSAEDYIIYVQIGNSTASALGVGNQSAV---GSAGFTISTQSAQAQFALDAIKNAIVSK
DFE_1910 STHDGSGLTPSGKMKIHFGTANDSAEDYIIYVQIGNSTASALGVGNQAV---AGAGFAISTQSAQAQFALDAIKNAIVSK
DFE_0352 STHTGSGLVSSGKLVHFGTGNDSEYIIYVQINTSTASAMGVGNQAAV---TSAGFTISTQSAQAQFALDAIKNAIVSK
DFE_2105 DTHTGSGLVSTGKMKVHFGTANDSEYIIYVQIRIDTSTASALGVGNQATS---TSAGFTISTQSAQAQFALDAIKNAIVSK
          * **.: :* :*:***:*.**.:*****: * . *** :*: * : * :***** ** ** .: :*:**

DFE_2355 DKIRANLGALENRLY-AVTNLEIMAENLQASESRISDVDVALEMTEFVRAQIMSQAAVAMLAQANSLPRMAMQLIGG-
DFE_2171 DKIRANLGALENRLY-AVTNLEIMAENLQASESRISDVDVALEMTEFVRNQLTQSATAMLAQANSLPRMAMQLIGG-
DFE_0942 DNIRAHLGAMQNRNLSNTISNLEIQAENLQAAESRISDVDVATEMTEYSKQIITQSATSMLAQANSLPQLALQLLGG-
DFE_0943 DNIRANLGALENRLY-AVTNLEIMAENLQASESRISDVDVATEMTEYSRQIISQSATSMLAQANSLPQLALQLLGG-
DFE_1910 DKIRAGLGAMQNRNLSNTISNLEIQAENLQAAESRISDVDVALEMTEFVRAQIMSQAAVAMLAQANSLPRMAMQLIGG-
DFE_0352 DKIRAAALGGIQRNLSNTISNLEIQAENLQAAESRISDVDVATEMTEFVRNQLTQSATAMLAQANSLPRMAMQLLGG-
DFE_2105 DKIRANLGALENRLY-AVTNLEIMAENLQASESRISDVDVALEMTEFVRQIISQSATSMLAQANSLPRMAMQLLGG-
          *:*:* *:*:*:*:*:* :*:***:*.**.:*****: *:*:*:*:*:*:*:*:*:*:*:*:*:*:*:*:*:*:*
          *:*:* *:*:*:*:*:* :*:***:*.**.:*****: *:*:*:*:*:*:*:*:*:*:*:*:*:*:*:*:*:*:*
```

Figure S1. Putative flagellins (Flc) in *D. ferrophilus*.

| <b>Organism</b>                | <b>fliC gene</b>       | <b>Promoter</b>       |
|--------------------------------|------------------------|-----------------------|
| <b><i>D. ferrophilus</i></b>   | <b><i>Dfe_0352</i></b> | <b><i>FliA</i></b>    |
|                                | <b><i>Dfe_0942</i></b> | <b>unknown</b>        |
|                                | <b><i>Dfe_0943</i></b> | <b>unknown</b>        |
|                                | <b><i>Dfe_1910</i></b> | <b><i>FliA</i></b>    |
|                                | <b><i>Dfe_2105</i></b> | <b><i>FliA</i></b>    |
|                                | <b><i>Dfe_2171</i></b> | <b><i>RpoN</i></b>    |
|                                | <b><i>Dfe_2355</i></b> | <b>unknown</b>        |
| <b><i>D. desulfuricans</i></b> | <b><i>Dde_1501</i></b> | <b><i>unknown</i></b> |
|                                | <b><i>Dde_1502</i></b> | <b>unknown</b>        |
|                                | <b><i>Dde_1570</i></b> | <b><i>FliA</i></b>    |
|                                | <b><i>Dde_1709</i></b> | <b><i>RpoN</i></b>    |
| <b><i>D. vulgaris</i></b>      | <b><i>Dvu_1441</i></b> | <b><i>RpoN</i></b>    |
|                                | <b><i>Dvu_2082</i></b> | <b><i>FliA</i></b>    |
|                                | <b><i>Dvu_2444</i></b> | <b>unknown</b>        |

Figure S2. *fliC* genes in *Desulfovibrio* species.

## Construction of *D. ferrophilus* $\Delta$ fliA

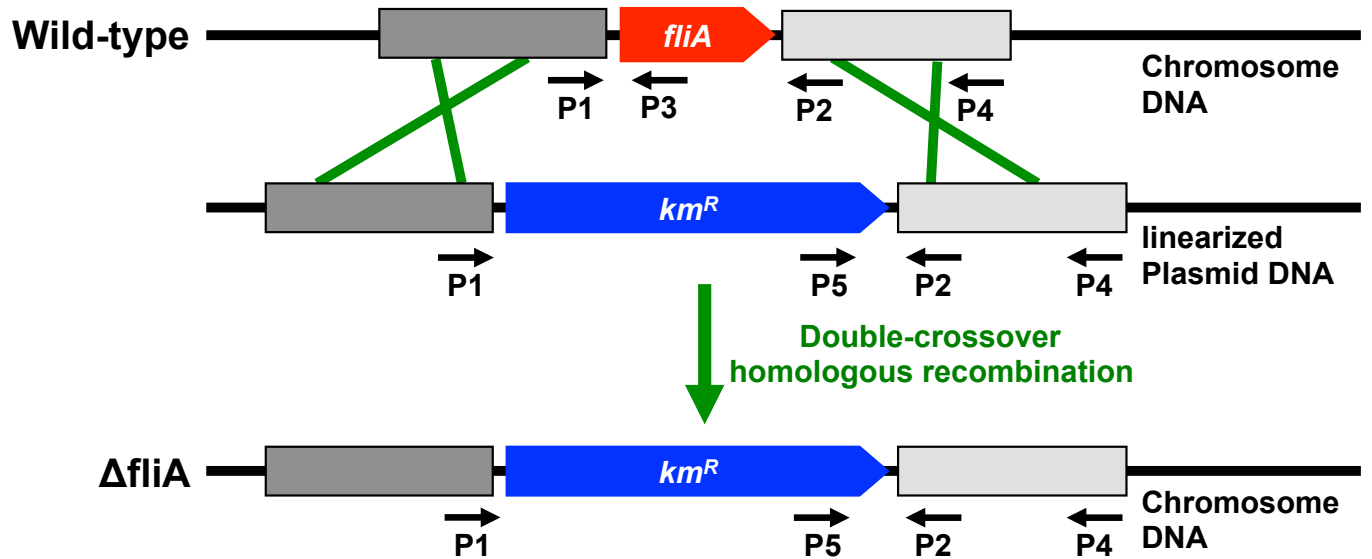

## PCR verification

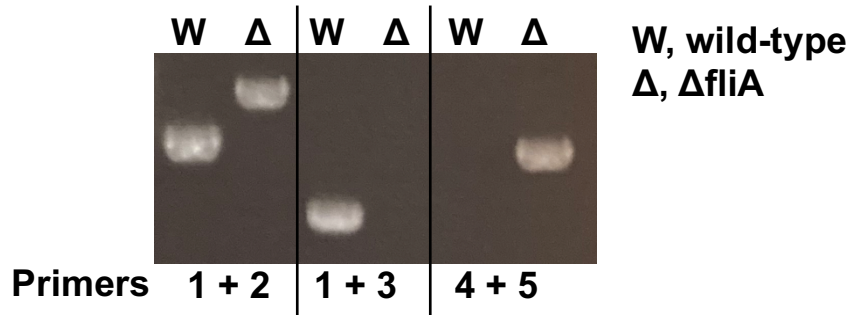

Figure S3. Construction of *D. ferrophilus*  $\Delta$ fliA strain.

**a**

|               |                                        |               |
|---------------|----------------------------------------|---------------|
| Gsu_consensus | GCTAAAGTTTT                            | GCCGATA G     |
| Dvu_consensus | TAAAG                                  | GCCGATA       |
| Dfe_0352_fliC | ACTAAAGTTACCCTGATTC-AAGCCGATAAGACTTGC  |               |
| Dfe_1910_fliC | CCTAAAGTAACTCCTCCACGAAGACGATGAGACTCCC  |               |
| Dfe_2105_fliC | CCTAAACTTTTCCCTCCCCGACGCCGAAGAGAAATTA  |               |
| Dfe_0007_ycgR | CTTAAGATTCTTGCACAGCC-AGCCGATTACGGTATA  |               |
| Dfe_0889_cheW | GGTAAACTCCTGAGGGGGAGCTGCCGATATGACCTGT  |               |
| Dfe_0231_mcp  | GATAAAATGCGTTGCATGG--TACTGATATGTCAGTT  |               |
| Dfe_1668_mcp  | CTTTATATAGCCAAGCATATTTTCCGATAAATCTAAT  |               |
| Dfe_1893_mcp  | GTTAAAGAAGATTTTTTGAT-GAGTCGATAAGACTTTG |               |
| Dfe_0031_hp   | TCTAAAGTGTCCGCTCTGCT-GTCCGATAAGACAGAA  |               |
| Dfe_2338_hp   | CCTAAAGGAACGGCCATAAT-GCCCGATAAGACTTGC  |               |
| Dfe_consensus | TAAANT                                 | GCCGATAAGACTT |

**b**

|          |                                        |
|----------|----------------------------------------|
| Dfe_0352 | ACTAAAGTTACCCTGATTC-AAGCCGATAAGACTTGC  |
| Dfe_1910 | CCTAAAGTAACTCCTCCACGAAGACGATGAGACTCCC  |
| Dfe_2105 | CCTAAACTTTTCCCTCCCCGACGCCGAAGAGAAATTA  |
| Dde_1570 | CCTAAAGTAAACGCCG-CACGCCGCCGATAGGAAAAGC |
| Dvu_2082 | CCTAAAGTCCCTACACCA-GCCGCCGATACGACAAGC  |

**c**

|          |                              |
|----------|------------------------------|
| Dfe_2171 | TTTGGCACTGTGATTGCTTGA        |
| Dde_1709 | TTTGGCACCACTTTGCTCAA         |
| Dvu_1441 | ATTGGCATCGTGTTTGCTGAT        |
|          | -24                      -12 |

Figure S4. Promoter region of genes for flagellar biosynthesis and motility.

(a) Putative FliA-dependent promoter elements in genes for flagellar biosynthesis and motility in *D. ferrophilus*. fliC, flagellin; ycgR, flagellar protein YcgR; cheW, chemotaxis protein W; mcp, methyl-accepting chemotaxis protein; and hp, hypothetical protein.

(b) Putative FliA-dependent promoter elements in *fliC* genes in *Desulfovibrio* species.

(c) Putative RpoN-dependent promoter elements in *fliC* genes in *Desulfovibrio* species. -24/-12 elements are indicated in red.

Gsu, *G. sulfurreducens*; Dfe, *D. ferrophilus*; Dde, *D. desulfuricans*; Dvu, *D. vulgaris*.

Highly conserved sequences are highlighted in yellow.

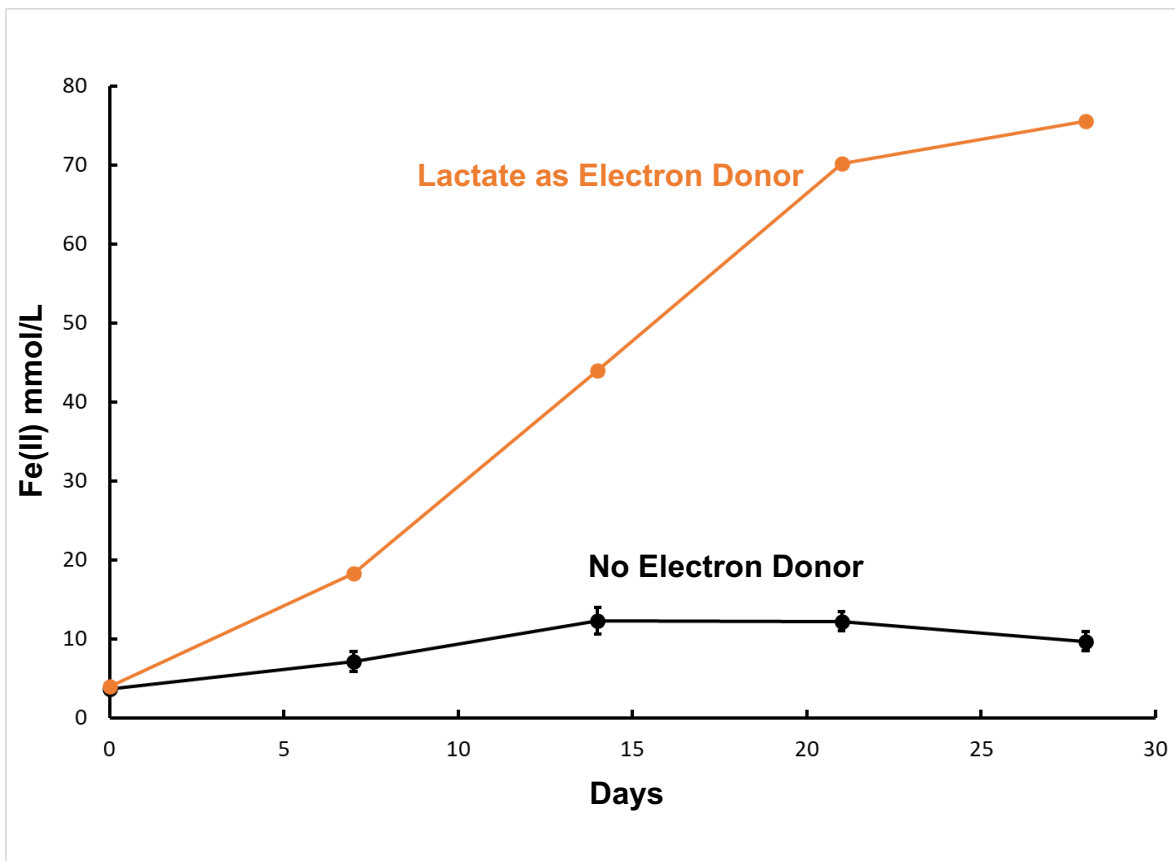

Figure S5. Lack of Fe(III) reduction in the absence of lactate. No electron donor data represents the mean and standard deviation of three replicate cultures.

Table S1. Primers used in this study.

Restriction enzyme sites are underlined. Restriction enzymes used to linearize plasmids for electroporation were indicated in bold.

| Name                                       | Sequence                         | Restriction enzyme |
|--------------------------------------------|----------------------------------|--------------------|
| Kanamycin-resistance gene                  |                                  |                    |
| km-F                                       | TCTGAATTCCTGACGGAACAGCGGGAAGTC   | EcoRI              |
| km-R                                       | TCTAAGCTTTCATAGAAGGCGGCGGTGGAATC | HindIII            |
| km-V                                       | CTTGACGAGTTCTTCTGAGC             |                    |
| Deletion of DFE_1249 ( $\Delta$ fliA)      |                                  |                    |
| fliA-up1                                   | ATCTCTAGACGAAGCTCGATGAAGCC       | <b>XbaI</b>        |
| fliA-up2                                   | TCTGAATTCAGGGCTCAGTCTTGG         | EcoRI              |
| fliA-do1                                   | TCTAAGCTTCACAACCTCACTCTCAAGC     | HindIII            |
| fliA-do2                                   | TCTGGTACCAGGAATCGGATCTTGTC       | KpnI               |
| fliA-P1                                    | TGCGAACGGCCGTAATCAAC             |                    |
| fliA-P2                                    | TACCGTCATCGGCTTCCACG             |                    |
| fliA-P3                                    | GTGACCTCCATGATTTTCGTC            |                    |
| Deletion of DFE_1797-1801 ( $\Delta$ pil5) |                                  |                    |
| pil5-up1                                   | TCTCTCGAGCTGATGCTGTTACCAAG       | <b>XhoI</b>        |
| pil5-up2                                   | TCTAAGCTTGTGGGACCGTCGGAAC        | HindIII            |
| pil5-do1                                   | TCTGAATTCGCACCCAAGTTGCAATAACC    | EcoRI              |
| pil5-do2                                   | ATCTCTAGATGGCAACAACGTTGTCGC      | XbaI               |
| pil5-P1                                    | TTCCGTAGGTAGAATGTCCG             |                    |
| pil5-P2                                    | CTCTTGTCATCGGTTACTGC             |                    |
| pil5-P3                                    | CCGTATTTCGATGCTGCACTG            |                    |
| Deletion of DFE_1987-1988 ( $\Delta$ spp)  |                                  |                    |
| spp-up1                                    | TCTGGTACCTAGATCTGTATCGGTAGC      | KpnI               |
| spp-up2                                    | TCTAAGCTTGAATGAAGTGGTTGCATC      | HindIII            |
| spp-do1                                    | TCTGAATTCGAACGGCAATACCCAG        | EcoRI              |
| spp-do2                                    | ATCTCTAGACAGGAGGCAATCTCTGC       | <b>XbaI</b>        |
| spp-P1                                     | AGCCATCTGATTCACTGCAC             |                    |
| spp-P2                                     | GTGTCGCTGCTGCATCAATC             |                    |
| spp-P3                                     | CTTGGACTTGATCAGCGTGC             |                    |
| Deletion of DFE_1992 ( $\Delta$ lpp)       |                                  |                    |
| lpp-up1                                    | TCTGGTACCAAGCGCTAAACACTTAGAC     | KpnI               |
| lpp-up2                                    | TCTAAGCTTACTACGTTCCGCTGATGC      | HindIII            |
| lpp-do1                                    | TCTGAATTCCTGCCCTAACACGG          | EcoRI              |
| lpp-do2                                    | ATCTCTAGATAGTACTCGGGATTGTCG      | <b>XbaI</b>        |
| lpp-P1                                     | ACCGTTGATGTACAATCCAG             |                    |
| lpp-P2                                     | TGAACTTGGGCATTGCTGTC             |                    |
| lpp-P3                                     | GTGTGTCATAGGCTTGCACG             |                    |

Deletion of DFE\_0448-0450 ( $\Delta$ 448-450)

|            |                                         |             |
|------------|-----------------------------------------|-------------|
| 448950-up1 | TCTGGTACCAGCCCAA <del>ACTACTGCGTG</del> | KpnI        |
| 448950-up2 | TCTAAGCTTCGGCCTCGCAGGCTGCAC             | HindIII     |
| 448950-do1 | TCTGAATTCGGCTGCCATAACAAGCAAC            | EcoRI       |
| 448950-do2 | ATCTCTAGACGTTTACC <del>GTGTGCCGC</del>  | <b>XbaI</b> |
| 448950-P1  | AGATCTATCGCCTGATGGAC                    |             |
| 448950-P2  | ATCAGTCTTATGGAGCGCAG                    |             |
| 448950-P3  | ATTGACGGCAACCAATGCAG                    |             |

Deletion of DFE\_0461-0462 ( $\Delta$ 461-462)

|          |                               |             |
|----------|-------------------------------|-------------|
| 4612-up1 | TCTGGTACCGGTTGTTGTCGTCATG     | KpnI        |
| 4612-up2 | TCTAAGCTTGTCAGCAGGTGTATGCC    | HindIII     |
| 4612-do1 | TCTGAATTCTGCAATGCCATAAGGGATAC | EcoRI       |
| 4612-do2 | ATCTCTAGACTGTTGTGCATGGTGTGAC  | <b>XbaI</b> |
| 4612-P1  | AAGTCCGCAGGCCAGGATAC          |             |
| 4612-P2  | AAGTGTCCGCCACATACAAC          |             |
| 4612-P3  | TTATCCGAGGAATGAGCATC          |             |

Deletion of DFE\_0464-0465 ( $\Delta$ 464-465)

|          |                               |             |
|----------|-------------------------------|-------------|
| 4645-up1 | TCTGGTACCTATGCACTGCGGTTTCGAC  | KpnI        |
| 4645-up2 | TCTAAGCTTGCCAGCCAGGCCAATACC   | HindIII     |
| 4645-do1 | TCTGAATTCAAGTTTGTGTCACGGC     | EcoRI       |
| 4645-do2 | ATCTCTAGAGGTATAACAGCTGTAGTCGC | <b>XbaI</b> |
| 4645-P1  | GCAGATATTGATGTTTCGGAC         |             |
| 4645-P2  | TCCAGTACATACGGGCATTC          |             |
| 4645-P3  | GTCCGTAATCAGCAGATTGG          |             |

---
